# Supplementary material for: Microbiota in health and diseases
Source: Springer Nature journal article supplement (doi:10.1038/s41392-022-00974-4), 2022-04-23
Supplement: 41392_2022_974_MOESM1_ESM.pdf [file 41392_2022_974_MOESM1_ESM.pdf]

Table S1. Summary of microbiota-related clinical trials

| Disease            | NCT#                           | Total patient (n) | Treatment group (n) | Response | No response |
|--------------------|--------------------------------|-------------------|---------------------|----------|-------------|
| Crohn's disease    | NCT02097797                    | 17                | 9                   | 4        | 5           |
|                    | DOI:10.1007/s10620-019-05751-y | 27                | 27                  | 18       | 9           |
|                    | NCT01757964                    | 9                 | 9                   | 7        | 2           |
|                    | NCT01793831                    | 139               | 174                 | 131      | 43          |
|                    | NCT01793831                    | 25                | 25                  | 17       | 8           |
| Ulcerative Colitis | ACTRN12613000236796            | 73                | 73                  | 15       | 58          |
|                    | NCT01545908.                   | 75                | 38                  | 9        | 29          |
|                    | NCT01650038                    | 50                | 50                  | 37       | 13          |
|                    | CTRI/2018/02/012148            | 31                | 31                  | 27       | 4           |
|                    | ChiCTR2000030080               | 20                | 10                  | 9        | 1           |
|                    | DOI:<br>10.1038/ismej.2017.44  | 34                | 34                  | 12       | 22          |

|                        |                                |      |     |     |     |
|------------------------|--------------------------------|------|-----|-----|-----|
|                        | NCT01560819                    | 10   | 9   | 7   | 2   |
|                        | NCT02390726                    | 12   | 6   | 3   | 3   |
|                        | NCT02575040                    | 30   | 30  | 21  | 9   |
|                        | ChiCTR-ONH-17012572            | 16   | 16  | 14  | 2   |
| C. difficile infection | NCT02743234                    | 64   | 24  | 22  | 2   |
|                        | NCT01703494                    | 46   | 46  | 35  | 11  |
|                        | DOI: 10.1007/s10620-017-4833-2 | 34   | 11  | 10  | 1   |
|                        | NCT01704937                    | 20   | 20  | 14  | 6   |
|                        | DOI: 10.1007/s15006-016-8305-y | 16   | 16  | 11  | 5   |
| Cancer                 | DOI: 10.1007/s00520-018-4216-z | 2982 | 390 | 278 | 112 |
|                        | NCT04040712                    | 20   | 10  | 10  | 0   |
|                        | DOI: 10.1016/j.nut.2018.06.004 | 73   | 39  | 27  | 12  |
